# Supplementary material for: Degradation of Human PDZ-Proteins by Human Alphapapillomaviruses Represents an Evolutionary Adaptation to a Novel Cellular Niche
Source: PubMed Central journal article supplement (PMC4472669; doi:10.1371/journal.ppat.1004980), 2015-06-18

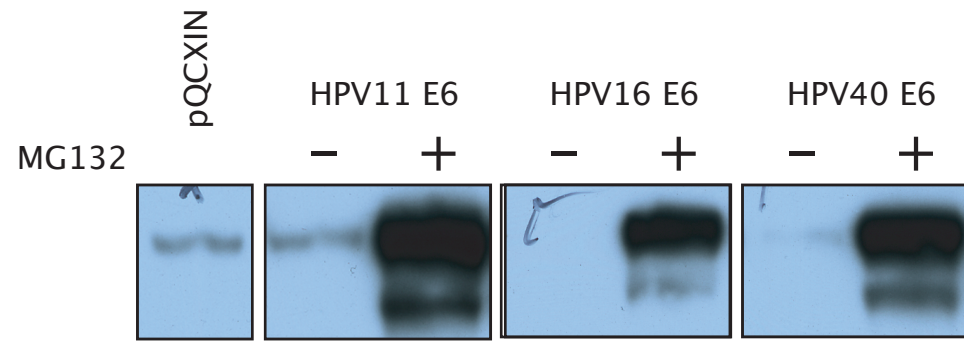

Supplement: ppat.1004980.s001.pdf [file ppat.1004980.s001.pdf]
